# Supplementary material for: A modeling approach to investigate drivers, variability and uncertainties in O 2 fluxes and O 2 : CO 2 exchange ratios in a temperate forest
Source: Copernicus journal article supplement (doi:10.5194/bg-20-4087-2023), 2023-10-06
Supplement: Supplementary file 1 [file bg-20-4087-2023-supplement.pdf]

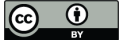

*Supplement of*

**A modeling approach to investigate drivers, variability and uncertainties in O<sub>2</sub> fluxes and O<sub>2</sub> : CO<sub>2</sub> exchange ratios in a temperate forest**

**Yuan Yan et al.**

*Correspondence to:* Yuan Yan ([yuanyantwincities@gmail.com](mailto:yuanyantwincities@gmail.com))

The copyright of individual parts of the supplement might differ from the article licence.

**Table S1. Nomenclature and abbreviations. \*\* Units with m<sup>-2</sup> indicate “per leaf area” (otherwise always “per ground area”).**

| Abbreviation                             | Unit                                    | Full name                                                                                                                                                                                                              |
|------------------------------------------|-----------------------------------------|------------------------------------------------------------------------------------------------------------------------------------------------------------------------------------------------------------------------|
| ARQ                                      | mol mol <sup>-1</sup>                   | apparent respiratory quotient                                                                                                                                                                                          |
| b                                        | μmol m <sup>-2</sup> s <sup>-1</sup> ** | intercept of Ball-Berry model after Collatz et al. (1991)                                                                                                                                                              |
| CO <sub>2 atm</sub>                      | ppm                                     | atmospheric CO <sub>2</sub> mole fraction                                                                                                                                                                              |
| c <sub>p</sub>                           | J kg <sup>-1</sup> K <sup>-1</sup>      | specific heat capacity of air                                                                                                                                                                                          |
| DOY                                      |                                         | day of year                                                                                                                                                                                                            |
| EquO <sub>2</sub>                        | ppm                                     | difference of O <sub>2</sub> mole fraction from 209750 ppm (derived as the intercept of the relationship between measured atmospheric O <sub>2</sub> and CO <sub>2</sub> mole fractions, see Table 1 in the main text) |
| ER                                       | mol mol <sup>-1</sup>                   | O <sub>2</sub> :CO <sub>2</sub> exchange ratio                                                                                                                                                                         |
| ER <sub>A</sub>                          | mol mol <sup>-1</sup>                   | O <sub>2</sub> :CO <sub>2</sub> exchange ratio of gross assimilation                                                                                                                                                   |
| ER <sub>A</sub> <sup>b</sup>             | mol mol <sup>-1</sup>                   | a priori mean of ER <sub>A</sub>                                                                                                                                                                                       |
| ER <sub>An</sub>                         | mol mol <sup>-1</sup>                   | O <sub>2</sub> :CO <sub>2</sub> exchange ratio of net assimilation                                                                                                                                                     |
| ER <sub>conc</sub>                       | mol mol <sup>-1</sup>                   | atmospheric O <sub>2</sub> :CO <sub>2</sub> mole fraction ratio                                                                                                                                                        |
| ER <sub>conc</sub> <sup>z</sup>          | mol mol <sup>-1</sup>                   | height dependent atmospheric O <sub>2</sub> :CO <sub>2</sub> mole fraction ratio                                                                                                                                       |
| ER <sub>eco</sub>                        | mol mol <sup>-1</sup>                   | ecosystem O <sub>2</sub> :CO <sub>2</sub> exchange ratio                                                                                                                                                               |
| ER <sub>eco</sub> <sup>z</sup>           | mol mol <sup>-1</sup>                   | height dependent ecosystem O <sub>2</sub> :CO <sub>2</sub> exchange ratio                                                                                                                                              |
| ER <sub>R</sub>                          | mol mol <sup>-1</sup>                   | O <sub>2</sub> :CO <sub>2</sub> exchange ratio of ecosystem respiration                                                                                                                                                |
| ER <sub>R</sub> <sup>b</sup>             | mol mol <sup>-1</sup>                   | a priori mean of ER <sub>R</sub>                                                                                                                                                                                       |
| ER <sub>rd</sub>                         | mol mol <sup>-1</sup>                   | O <sub>2</sub> :CO <sub>2</sub> exchange ratio of leaf dark respiration                                                                                                                                                |
| ER <sub>soil</sub>                       | mol mol <sup>-1</sup>                   | O <sub>2</sub> :CO <sub>2</sub> exchange ratio of soil respiration                                                                                                                                                     |
| ER <sub>stem</sub>                       | mol mol <sup>-1</sup>                   | O <sub>2</sub> :CO <sub>2</sub> exchange ratio of stem respiration                                                                                                                                                     |
| F <sub>A</sub>                           | μmol m <sup>-2</sup> s <sup>-1</sup>    | gross assimilation CO <sub>2</sub> flux (gross carboxylation minus photorespiration)                                                                                                                                   |
| F <sub>A</sub> <sup>b</sup>              | μmol m <sup>-2</sup> s <sup>-1</sup>    | a priori mean of F <sub>A</sub>                                                                                                                                                                                        |
| F <sub>CO<sub>2</sub></sub>              | μmol m <sup>-2</sup> s <sup>-1</sup>    | net ecosystem CO <sub>2</sub> flux                                                                                                                                                                                     |
| F <sub>CO<sub>2</sub></sub> <sup>z</sup> | μmol m <sup>-2</sup> s <sup>-1</sup>    | height dependent net ecosystem CO <sub>2</sub> flux                                                                                                                                                                    |
| F <sub>CO<sub>2</sub></sub> <sup>~</sup> | μmol m <sup>-2</sup> s <sup>-1</sup>    | net turbulent CO <sub>2</sub> flux                                                                                                                                                                                     |
| f <sub>DBH</sub>                         |                                         | fraction of stem diameter to the diameter at breast height                                                                                                                                                             |

|                         |                                      |                                                                                         |
|-------------------------|--------------------------------------|-----------------------------------------------------------------------------------------|
| $f_{LAI}$               |                                      | fraction of LAI per layer                                                               |
| $F_{O_2}$               | $\mu\text{mol m}^{-2} \text{s}^{-1}$ | net ecosystem $O_2$ flux                                                                |
| $F_{O_2}^z$             | $\mu\text{mol m}^{-2} \text{s}^{-1}$ | height dependent net ecosystem $O_2$ flux                                               |
| $F_{O_2}^{\sim}$        | $\mu\text{mol m}^{-2} \text{s}^{-1}$ | net turbulent $O_2$ flux                                                                |
| $F_R$                   | $\mu\text{mol m}^{-2} \text{s}^{-1}$ | gross ecosystem respiration $CO_2$ flux                                                 |
| $F_R^b$                 | $\mu\text{mol m}^{-2} \text{s}^{-1}$ | a priori mean of $F_R$                                                                  |
| $F_{rd}$                | $\mu\text{mol m}^{-2} \text{s}^{-1}$ | leaf dark respiration $CO_2$ flux                                                       |
| $F_{soil}$              | $\mu\text{mol m}^{-2} \text{s}^{-1}$ | soil respiration $CO_2$ flux                                                            |
| $F_{stem}$              | $\mu\text{mol m}^{-2} \text{s}^{-1}$ | stem respiration $CO_2$ flux                                                            |
| $H$                     | $W \text{m}^{-2}$                    | net ecosystem sensible heat flux                                                        |
| $H^{\sim}$              | $W \text{m}^{-2}$                    | net turbulent sensible heat flux                                                        |
| $ht$                    | m                                    | canopy height                                                                           |
| $J$                     |                                      | cost function                                                                           |
| $J_{\text{max}25}$      | $\mu\text{mol m}^{-2} \text{s}^{-1}$ | maximum electron transport rate at $25^\circ\text{C}$                                   |
| $k_{ball}$              |                                      | slope of Ball-Berry model after Collatz et al. (1991)                                   |
| $K_c, K_o, K_T, K_v$    | $\text{m}^2 \text{s}^{-1}$           | eddy diffusivity of $CO_2$ , $O_2$ , heat and water vapor                               |
| LAI                     | $\text{m}^2 \text{m}^{-2}$           | leaf area index                                                                         |
| LE                      | $W \text{m}^{-2}$                    | net ecosystem latent heat flux                                                          |
| $LE^{\sim}$             | $W \text{m}^{-2}$                    | net turbulent latent heat flux                                                          |
| $leaf_{out}$            |                                      | DOY for the start of leaf growth                                                        |
| $leaf_{full}$           |                                      | DOY for the end of leaf growth                                                          |
| $leaf_{fall}$           |                                      | DOY for the start of leaf fall                                                          |
| $leaf_{fall\_complete}$ |                                      | DOY for the end of leaf fall                                                            |
| MCMC                    |                                      | Markov-Chain Monte Carlo methods                                                        |
| $O_{2 \text{ atm}}$     | ppm                                  | atmospheric $O_2$ mole fraction                                                         |
| OR                      |                                      | oxidative ratio                                                                         |
| $r_1, r_2$              |                                      | coefficients for exponential relationship between soil temperature and soil respiration |
| $R_{d25}$               | $\mu\text{mol m}^{-2} \text{s}^{-1}$ | leaf dark respiration at $25^\circ\text{C}$                                             |
| RMSE                    |                                      | root mean squared error                                                                 |

|                                         |                                         |                                                                                                                                                                                                                                           |
|-----------------------------------------|-----------------------------------------|-------------------------------------------------------------------------------------------------------------------------------------------------------------------------------------------------------------------------------------------|
| T                                       | °C                                      | air temperature                                                                                                                                                                                                                           |
| T <sub>leaf</sub>                       | °C                                      | leaf temperature                                                                                                                                                                                                                          |
| T <sub>optjm</sub>                      | °C                                      | optimum temperature for electron transport                                                                                                                                                                                                |
| T <sub>optvc</sub>                      | °C                                      | optimum temperature for maximum carboxylation                                                                                                                                                                                             |
| V <sub>cmax25</sub>                     | μmol m <sup>-2</sup> s <sup>-1</sup> ** | maximum carboxylation at 25 °C                                                                                                                                                                                                            |
| WAI                                     | m <sup>2</sup> m <sup>-2</sup>          | wood area index                                                                                                                                                                                                                           |
| z                                       | m                                       | height above the surface                                                                                                                                                                                                                  |
| α                                       |                                         | fraction of the photosystem II activity                                                                                                                                                                                                   |
| Δc                                      | ppm                                     | vertical CO <sub>2</sub> mole fraction difference                                                                                                                                                                                         |
| ΔF <sub>O<sub>2</sub>, (c,T,v)</sub>    | μmol m <sup>-2</sup> s <sup>-1</sup>    | difference between O <sub>2</sub> fluxes derived by the flux-gradient method and by model simulations. The subscripts c, T and v represent the considered scalar profiles for CO <sub>2</sub> mole fraction, temperature and water vapor. |
| Δo                                      | ppm                                     | vertical O <sub>2</sub> mole fraction difference                                                                                                                                                                                          |
| ΔT                                      | °C                                      | vertical air temperature difference                                                                                                                                                                                                       |
| Δv                                      | kg m <sup>-3</sup>                      | vertical water vapor density difference                                                                                                                                                                                                   |
| Δz                                      | m                                       | vertical height difference                                                                                                                                                                                                                |
| θ <sub>j</sub>                          |                                         | curvature parameter of light response curve                                                                                                                                                                                               |
| λ                                       | J kg <sup>-1</sup>                      | latent heat of vaporization                                                                                                                                                                                                               |
| ρ <sub>m</sub>                          | kg m <sup>-3</sup>                      | air mass density                                                                                                                                                                                                                          |
| ρ <sub>n</sub>                          | mol m <sup>-3</sup>                     | air molar density                                                                                                                                                                                                                         |
| σ <sub>ER<sub>A</sub></sub>             | mol mol <sup>-1</sup>                   | a posteriori uncertainty of ER <sub>A</sub>                                                                                                                                                                                               |
| σ <sub>ER<sub>A</sub><sup>b</sup></sub> | mol mol <sup>-1</sup>                   | a priori uncertainty of ER <sub>A</sub>                                                                                                                                                                                                   |
| σ <sub>ER<sub>R</sub></sub>             | mol mol <sup>-1</sup>                   | a posteriori uncertainty of ER <sub>R</sub>                                                                                                                                                                                               |
| σ <sub>ER<sub>R</sub><sup>b</sup></sub> | mol mol <sup>-1</sup>                   | a priori uncertainty of ER <sub>R</sub>                                                                                                                                                                                                   |
| σ <sub>F<sub>A</sub></sub>              | μmol m <sup>-2</sup> s <sup>-1</sup>    | a posteriori uncertainty of F <sub>A</sub>                                                                                                                                                                                                |
| σ <sub>F<sub>A</sub><sup>b</sup></sub>  | μmol m <sup>-2</sup> s <sup>-1</sup>    | a priori uncertainty of F <sub>A</sub>                                                                                                                                                                                                    |
| σ <sub>F<sub>CO<sub>2</sub></sub></sub> | μmol m <sup>-2</sup> s <sup>-1</sup>    | uncertainty of CO <sub>2</sub> flux estimates                                                                                                                                                                                             |
| σ <sub>F<sub>O<sub>2</sub></sub></sub>  | μmol m <sup>-2</sup> s <sup>-1</sup>    | uncertainty of O <sub>2</sub> flux estimates                                                                                                                                                                                              |
| σ <sub>F<sub>R</sub></sub>              | μmol m <sup>-2</sup> s <sup>-1</sup>    | a posteriori uncertainty of F <sub>R</sub>                                                                                                                                                                                                |
| σ <sub>F<sub>R</sub><sup>b</sup></sub>  | μmol m <sup>-2</sup> s <sup>-1</sup>    | a priori uncertainty of F <sub>R</sub>                                                                                                                                                                                                    |

## References

- 5 Collatz, G. J., Ball, J. T., Grivet, C., and Berry, J. A.: Physiological and environmental-regulation of stomatal conductance, photosynthesis and transpiration - a model that includes a laminar boundary-layer, *Agricultural and Forest Meteorology*, 54, 107-136, doi:10.1016/0168-1923(91)90002-8, 1991.
